# Supplementary material for: Computational and experimental search for potential polyanionic K-ion cathode materials
Source: Royal Society of Chemistry journal article supplement (doi:10.1039/d1ta05300k), 2021-01-01
Supplement: d1ta05300k1.pdf [file d1ta05300k1.pdf]

**Computational and experimental materials search of potential polyanionic K-ion cathodes**

**Supplementary Information**

Jingyang Wang<sup>a,b+</sup>, Bin Ouyang<sup>a,b+</sup>, Hyunchul Kim<sup>a</sup>, Tian Yaosen<sup>b</sup>, Gerbrand Ceder<sup>a,b\*</sup> and Haegyeom Kim<sup>a\*</sup>

a. Materials Sciences Division, Lawrence Berkeley National Laboratory, Berkeley, CA 94720, USA

b. Department of Materials Science and Engineering, University of California, Berkeley, CA 94720, USA

+equal contribution

\*Corresponding author:

Dr. Haegyeom Kim (Email: haegyumkim@lbl.gov)

Prof. Gerbrand Ceder (Email: gceder@berkeley.edu)

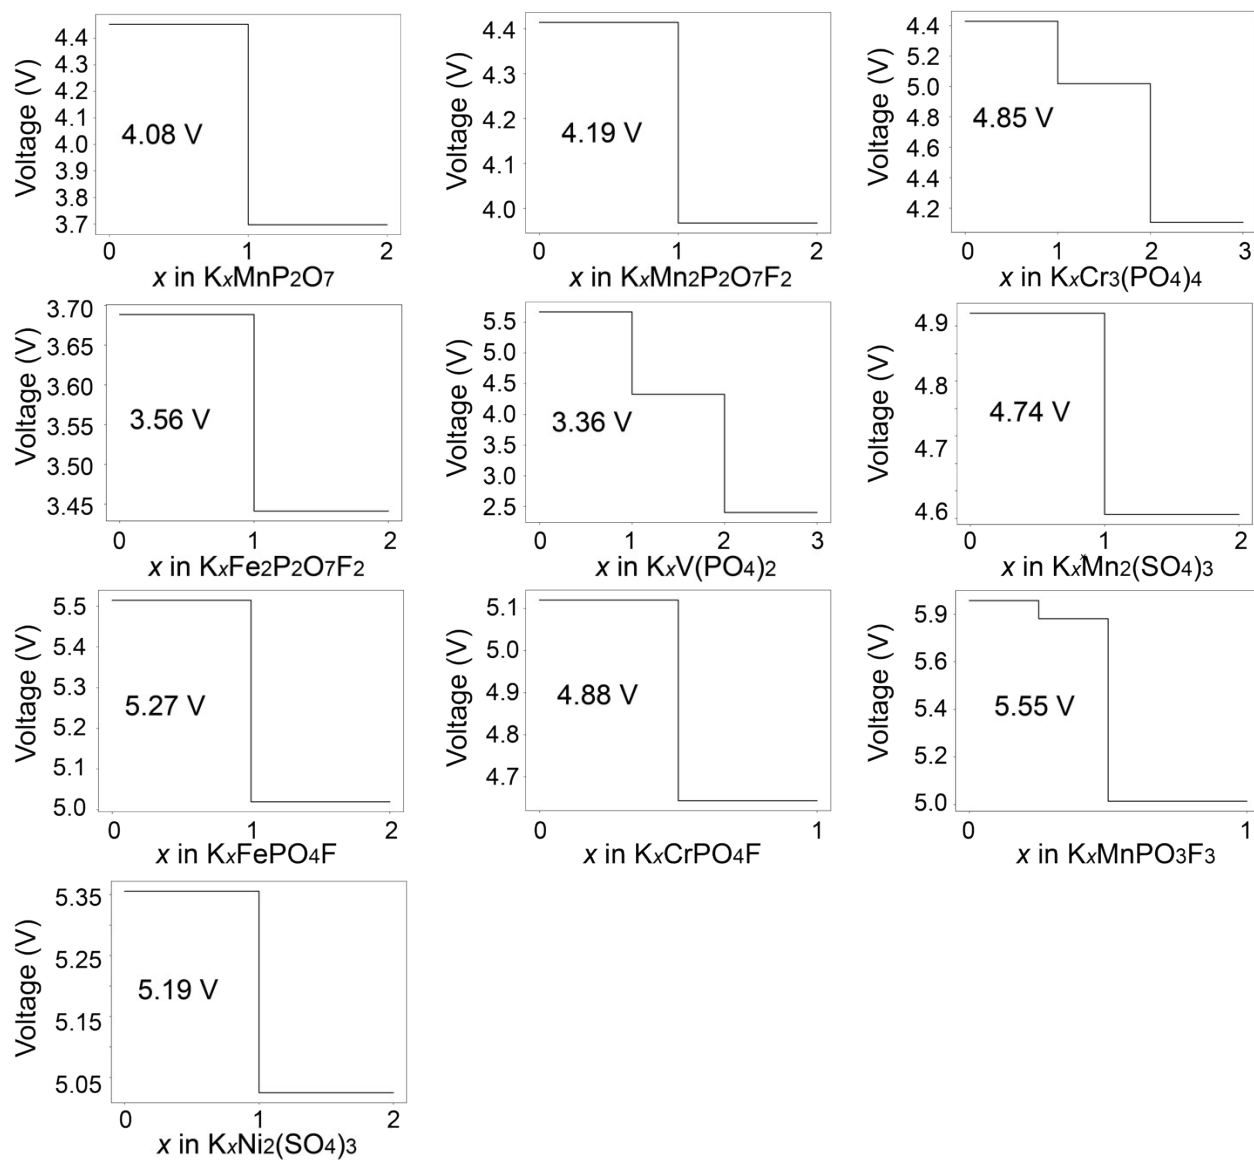

**Figure S1.** Calculated voltage profiles of the 10 compounds listed in Table 1.

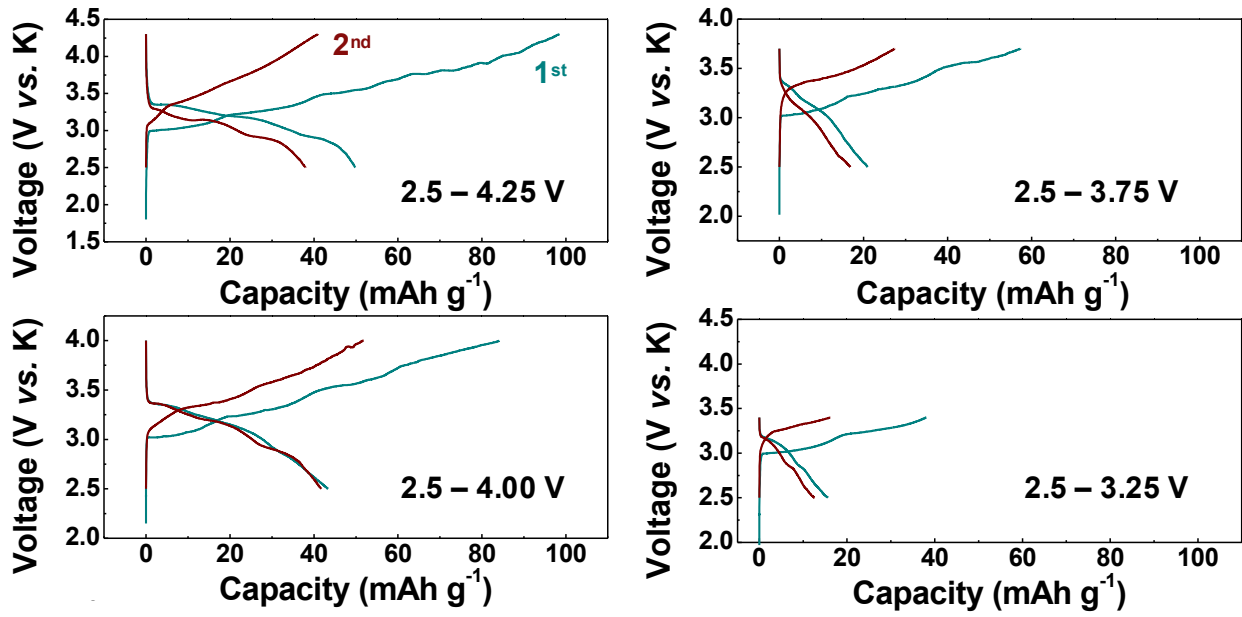

Figure S2. Electrochemical voltage profiles of  $K_6V_2(PO_4)_4$  at different cut-off voltages.

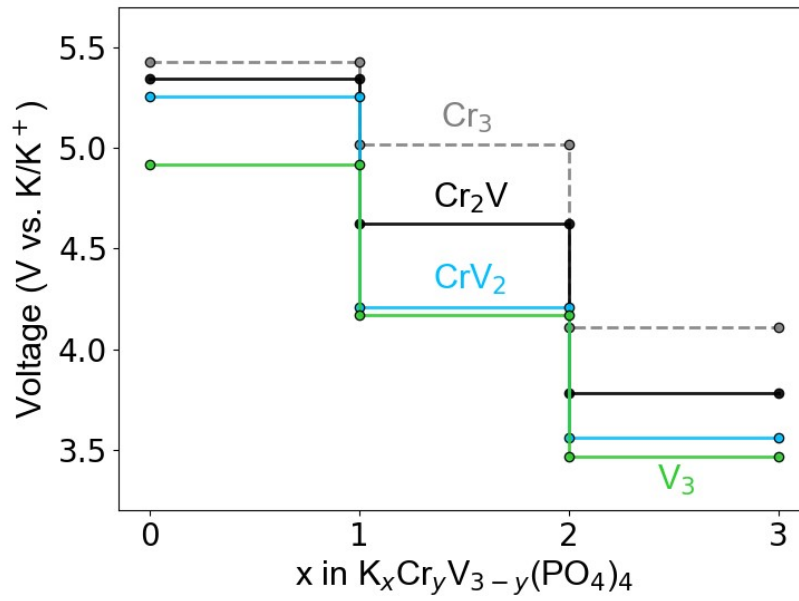

**Figure S3.** Calculated voltage profiles of  $K_x V_{3-y} Cr_y (PO_4)_4$  ( $x = 0, 1, 2, 3$ ) system.

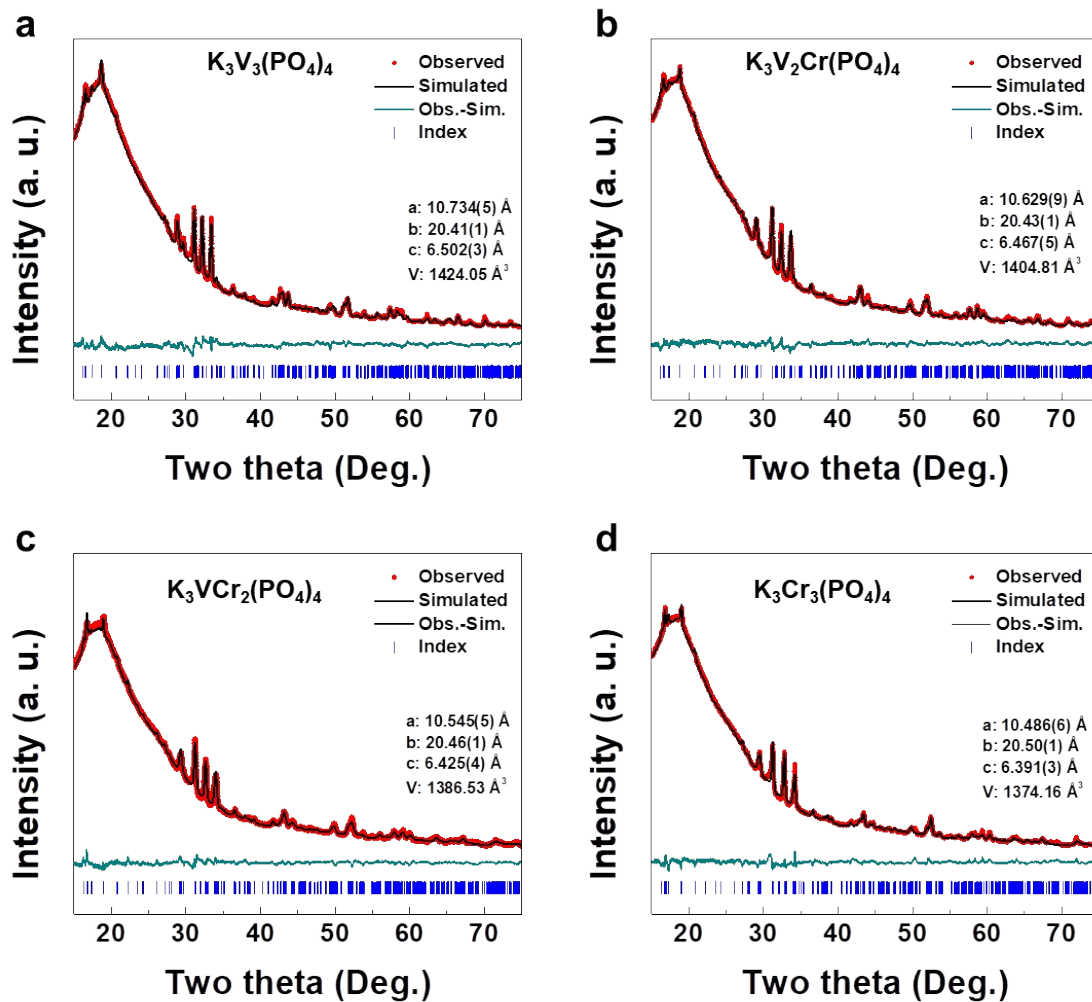

Figure S4. Refinement results of **a.**  $K_3V_3(PO_4)_4$ , **b.**  $K_3V_2Cr(PO_4)_4$ , **c.**  $K_3VCr_2(PO_4)_4$ , and **d.**  $K_3Cr_3(PO_4)_4$ .

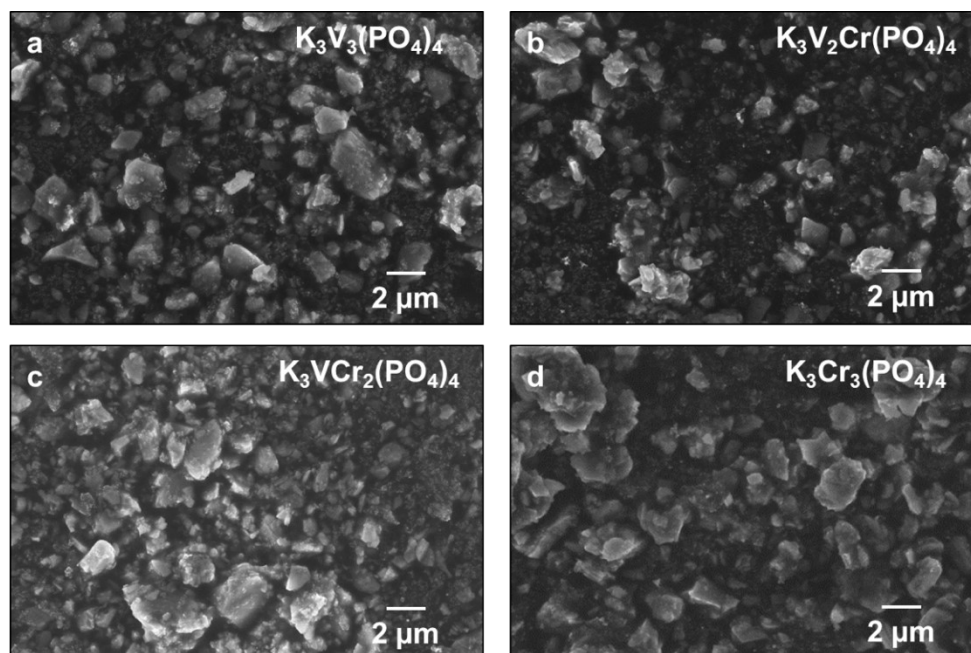

**Figure S5.** SEM images of **a.**  $K_3V_3(PO_4)_4$ , **b.**  $K_3V_2Cr(PO_4)_4$ , **c.**  $K_3VCr_2(PO_4)_4$ , and **d.**  $K_3Cr_3(PO_4)_4$ .

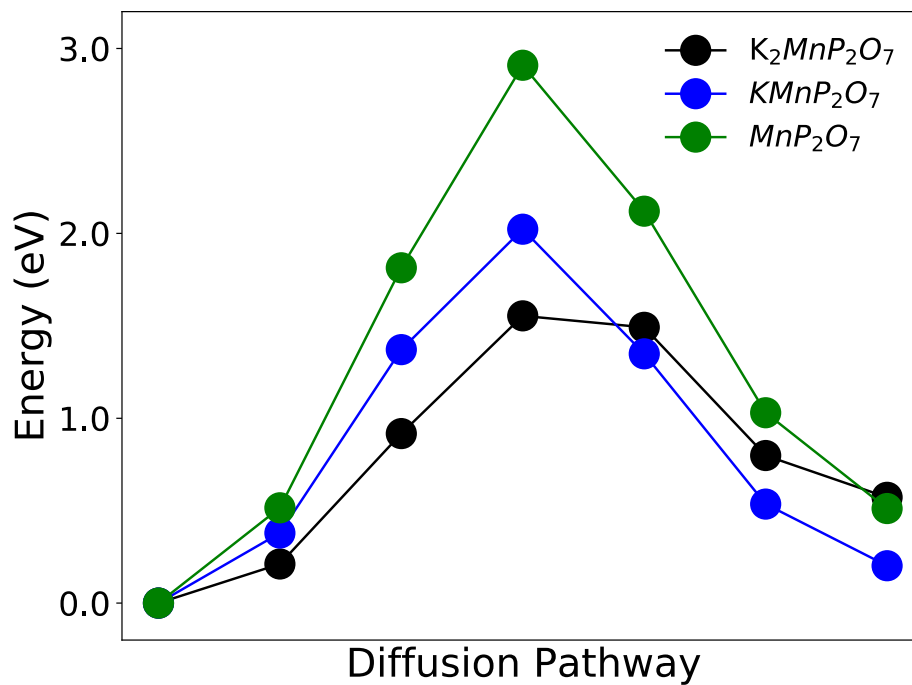

**Figure S6.** The energy change associated with K<sup>+</sup> diffusion in the K<sub>x</sub>MnP<sub>2</sub>O<sub>7</sub> structure calculated through Nudged Elastic Band (NEB) method.
